# Supplementary material for: Post-translational modification patterns on β-myosin heavy chain are altered in ischemic and nonischemic human hearts
Source: eLife journal article supplement (doi:10.7554/elife.74919), 2022-05-03

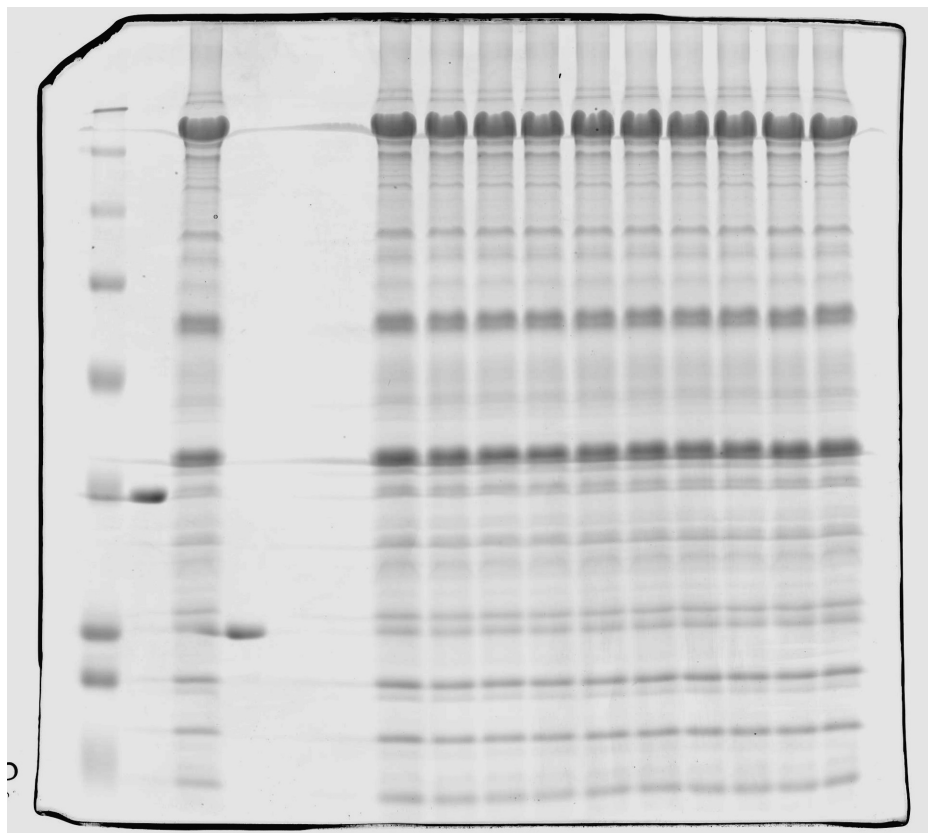

Supplement: fig1-figsupp1-data1 [file elife-74919-fig1-figsupp1-data1-v2.pdf]
