# Supplementary material for: Post-translational modification patterns on β-myosin heavy chain are altered in ischemic and nonischemic human hearts
Source: eLife. 2022 May 3;11:e74919. doi: 10.7554/eLife.74919 (PMC9122498; doi:10.7554/eLife.74919)
Supplement: Figure 7—source data 1. [file elife-74919-fig7-data1.xlsx]

## Sheet: K58SASA
System	Run 1	Run 2	Run 3	Avg	Stdev
WT	38.36	36.1	36.92	37.13	0.93
K58Ac	144.62	144.73	140.47	143.27	1.98

## Sheet: K72SASA
System	Run 1 (Å2)	Run 2 (Å2)	Run 3 (Å2)	Avg (Å2)	Stdev (Å2)
WT	44.3	46.67	46.46	45.82	1.05
K58Ac	35.92	36.82	38.39	37.04	1.02
