# Supplementary material for: Post-translational modification patterns on β-myosin heavy chain are altered in ischemic and nonischemic human hearts
Source: eLife. 2022 May 3;11:e74919. doi: 10.7554/eLife.74919 (PMC9122498; doi:10.7554/eLife.74919)
Supplement: Figure 8—source data 1. [file elife-74919-fig8-data1.xlsx]

## Sheet: Sheet1
Contact	WT Avg (%)	WT StDev (%)	K213Ac/T215P Avg (%)	K213Ac/T215P StDev (%)
213-215	8	5	24	7
213-334	22	4	6	3
213-337	56	6	15	3
215-204	25	4	67	8
