# Supplementary material for: Post-translational modification patterns on β-myosin heavy chain are altered in ischemic and nonischemic human hearts
Source: eLife. 2022 May 3;11:e74919. doi: 10.7554/eLife.74919 (PMC9122498; doi:10.7554/eLife.74919)
Supplement: Figure 9—source data 1. [file elife-74919-fig9-data1.xlsx]

## Sheet: Sheet1
Contact	WT Avg (%)	WT StDev (%)	K951Ac Avg (%)	K951Ac StDev (%)
951(A)-948(A)	40	5	53	7
951(A)-954(A)	15	7	48	5
951(A)-949(B)	18	8	5	5
951(A)-950(B)	59	5	33	4
