# Supplementary material for: Post-translational modification patterns on β-myosin heavy chain are altered in ischemic and nonischemic human hearts
Source: eLife. 2022 May 3;11:e74919. doi: 10.7554/eLife.74919 (PMC9122498; doi:10.7554/eLife.74919)
Supplement: Figure 9—source data 2. [file elife-74919-fig9-data2.xlsx]

## Sheet: Sheet1
Atom Pair	Xray (Å)	WT Avg (Å)	WT StDev (Å)	K951Ac Avg (Å)	K951Ac StDev (Å)
923.A@CA-923.B@CA	9.8	10	0.6	10.2	0.8
930.A@CA-930.B@CA	9	9.9	0.9	10.9	1.7
937.A@CA-930.B@CA	8.9	9.5	0.4	10.7	1.7
944.A@CA-944.B@CA	9.2	0.2	0.5	10.6	1.8
951.A@CA-951.B@CA	9.4	10.2	1	11.6	2.6
958.A@CA-951.B@CA	10	16.1	7.1	15.7	6.8
