# Supplementary material for: Post-translational modification patterns on β-myosin heavy chain are altered in ischemic and nonischemic human hearts
Source: eLife. 2022 May 3;11:e74919. doi: 10.7554/eLife.74919 (PMC9122498; doi:10.7554/eLife.74919)
Supplement: Table 4—source data 1. [file elife-74919-table4-data1.xlsx]

## Sheet: Sheet1
ID	Run Number	Ca RMSD (Å)
4DB1 Unmodified	1	3.9 ± 0.3
	2	3.2 ± 0.3
	3	4.1 ± 0.3
4DB1 K58-Ac	1	3.8 ± 0.3
	2	3.6 ± 0.2
	3	4.1 ± 0.5
4DB1 K213-Ac/T215-P	1	3.5 ± 0.4
	2	3.6 ± 0.4
	3	3.6 ± 0.3
2FXM Unmodified	1	6.9 ± 2.4
	2	7.5 ± 2.3
	3	7.2 ± 2.4
2FMX K951-Ac	1	10.8 ± 2.8
	2	9.2 ± 2.5
	3	10.1 ± 2.0
